# Supplementary material for: Discovery of Novel Stimulators of Pax7 and/or MyoD: Enhancing the Efficacy of Cultured Meat Production through Culture Media Enrichment
Source: MDPI journal article supplement (doi:10.3390/bios14010024), 2023-12-30
Supplement: s1 [file s1]

# Supplementary Material

**Supplementary Table S1. List of 196 chemicals used for ligand screening by SPR**

| No | Name                                | MW     | Final concentration (μM) | ALogP  | HBA_Count | HBD_Count |
|----|-------------------------------------|--------|--------------------------|--------|-----------|-----------|
| 1  | (-)-Epigallocatechin gallate        | 458.37 | 157                      | 3.097  | 3         | 8         |
| 2  | (-)-Parthenolide                    | 248.32 | 197                      | 2.923  | 3         | 0         |
| 3  | (+)-Matrine                         | 248.36 | 197                      | 1.417  | 1         | 0         |
| 4  | (+)-Usniacin                        | 344.32 | 12                       | 1.087  | 4         | 3         |
| 5  | (+,-)-Octopamine hydrochloride      | 189.64 | 200                      | 0.565  | 0         | 3         |
| 6  | (20S)-Protopanaxatriol              | 476.73 | 199                      | 4.62   | 0         | 3         |
| 7  | 10,11-Dimethoxystrychnine           | 394.46 | 198                      | 1.112  | 4         | 0         |
| 8  | 2,6-Dihydroxypurine                 | 152.11 | 13                       | -0.718 | 3         | 3         |
| 9  | 20-Hydroxyecdysone                  | 480.63 | 200                      | 1.137  | 1         | 3         |
| 10 | 2'-Deoxyinosine                     | 252.23 | 95                       | -1.482 | 4         | 3         |
| 11 | 2-Methoxy-1,4-naphthoquinone        | 188.18 | 197                      | 1.445  | 3         | 0         |
| 12 | 4-Demethylepipodophyllotoxin        | 400.38 | 200                      | 1.886  | 6         | 2         |
| 13 | 4-Hydroxybenzoic acid               | 138.12 | 195                      | 1.217  | 1         | 1         |
| 14 | 4-Methylumbelliferone               | 176.17 | 199                      | 2.104  | 2         | 1         |
| 15 | 5-Aminolevulinic acid hydrochloride | 167.59 | 203                      | -3.318 | 2         | 1         |
| 16 | 5-hydroxytryptophan                 | 220.22 | 200                      | -1.554 | 1         | 3         |
| 17 | 6-Hydroxyflavone                    | 238.24 | 197                      | 2.894  | 2         | 1         |
| 18 | Adenosine                           | 267.24 | 45                       | -1.881 | 4         | 4         |
| 19 | Alizarin                            | 240.21 | 200                      | 2.324  | 2         | 2         |
| 20 | Aloe-emodin                         | 270.24 | 11                       | 1.719  | 2         | 3         |
| 21 | Aloin                               | 418.39 | 198                      | -0.404 | 2         | 7         |
| 22 | Aminophylline                       | 420.43 | 126                      | -2.089 | 6         | 4         |
| 23 | Ammonium glycyrrhizinate            | 839.96 | 200                      | -0.915 | 8         | 5         |
| 24 | Amphotericin B                      | 924.08 | 24                       | -2.617 | 6         | 10        |
| 25 | Andrographolide                     | 350.45 | 200                      | 2.056  | 2         | 3         |
| 26 | Apigenin                            | 270.24 | 200                      | 2.41   | 2         | 3         |
| 27 | Apocynin                            | 166.17 | 199                      | 1.311  | 2         | 1         |
| 28 | Arbutin                             | 272.25 | 202                      | -0.584 | 2         | 5         |
| 29 | Arecoline hydrobromide              | 236.11 | 199                      | 1.234  | 2         | 0         |
| 30 | Artemether                          | 298.37 | 201                      | 2.029  | 5         | 0         |
| 31 | Artemisinin                         | 282.33 | 202                      | 1.998  | 5         | 0         |
| 32 | Artesunate                          | 384.42 | 200                      | 1.845  | 7         | 0         |
| 33 | Asaraldehyde                        | 196.2  | 199                      | 1.54   | 4         | 0         |
| 34 | Asiatic Acid                        | 488.7  | 198                      | 4.435  | 1         | 3         |
| 35 | Asiaticoside                        | 959.12 | 104                      | -0.101 | 7         | 12        |
| 36 | Astragaloside A                     | 784.97 | 127                      | -0.348 | 5         | 8         |
| 37 | Baicalein                           | 270.24 | 200                      | 2.41   | 2         | 3         |
| 38 | Baicalin                            | 446.36 | 199                      | 0.608  | 5         | 5         |
| 39 | Berberamine                         | 681.65 | 147                      | 7.756  | 5         | 1         |
| 40 | Berberine chloride                  | 371.81 | 108                      | 1.289  | 4         | 0         |
| 41 | Bergenin                            | 328.27 | 201                      | -0.849 | 4         | 5         |
| 42 | Betaine                             | 117.15 | 196                      | -3.028 | 0         | 0         |
| 43 | Betulinic acid                      | 456.7  | 44                       | 6.546  | 1         | 1         |
| 44 | Bilobalide                          | 326.3  | 199                      | -0.641 | 6         | 1         |
| 45 | Biochanin A                         | 284.26 | 201                      | 2.366  | 3         | 2         |
| 46 | Biotin                              | 244.31 | 201                      | 0.67   | 2         | 2         |
| 47 | Borneol                             | 154.25 | 194                      | 1.975  | 0         | 1         |

|    |                                        |         |     |        |    |    |
|----|----------------------------------------|---------|-----|--------|----|----|
| 48 | Caffeic acid                           | 180.16  | 200 | 1.443  | 1  | 2  |
| 49 | Catharanthine                          | 336.43  | 199 | 3.877  | 2  | 1  |
| 50 | Celastrol                              | 450.61  | 200 | 5.475  | 2  | 1  |
| 51 | Cephalomannine                         | 831.9   | 120 | 2.937  | 11 | 3  |
| 52 | Chenodeoxycholic acid                  | 392.57  | 201 | 4.014  | 1  | 2  |
| 53 | Chloramphenicol                        | 323.13  | 201 | 1.025  | 1  | 3  |
| 54 | Cholic acid                            | 408.57  | 198 | 2.912  | 1  | 3  |
| 55 | Chrysin                                | 254.24  | 201 | 2.652  | 2  | 2  |
| 56 | Chrysophanic acid                      | 254.24  | 20  | 2.81   | 2  | 2  |
| 57 | Cinchonidine                           | 294.39  | 200 | 2.75   | 1  | 1  |
| 58 | Cinchonine                             | 294.4   | 31  | 2.75   | 1  | 1  |
| 59 | Cinnamic acid                          | 148.16  | 196 | 1.927  | 1  | 0  |
| 60 | Cordycepin                             | 251.24  | 199 | -1.308 | 4  | 3  |
| 61 | Cortisone acetate                      | 402.48  | 17  | 1.619  | 5  | 0  |
| 62 | Cryptotanshinone                       | 296.36  | 17  | 3.761  | 3  | 0  |
| 63 | Curcumol                               | 236.35  | 199 | 2.786  | 1  | 0  |
| 64 | Cyclosporin A                          | 1202.61 | 83  | 4.333  | 11 | 5  |
| 65 | Daidzein                               | 254.24  | 201 | 2.382  | 2  | 2  |
| 66 | Daidzin                                | 416.38  | 199 | 0.452  | 4  | 5  |
| 67 | Daphnetin                              | 178.14  | 196 | 1.415  | 2  | 2  |
| 68 | Daunorubicin hydrochloride             | 563.98  | 177 | 1.01   | 6  | 4  |
| 69 | Dehydrocostus Lactone                  | 230.3   | 200 | 3.282  | 2  | 0  |
| 70 | Dehydroepiandrosterone                 | 288.43  | 198 | 3.338  | 1  | 1  |
| 71 | Demethylzeylasteral                    | 480.59  | 200 | 5.357  | 3  | 2  |
| 72 | Diammonium glycyrrhizinate             | 856.99  | 117 | -4.247 | 8  | 5  |
| 73 | Dihydromyricetin                       | 320.25  | 200 | 1.237  | 2  | 6  |
| 74 | Dihydrothymine                         | 128.13  | 195 | -0.45  | 2  | 2  |
| 75 | D-Mannitol                             | 182.17  | 198 | -2.941 | 0  | 6  |
| 76 | Dopamine hydrochloride                 | 189.64  | 200 | 1.155  | 0  | 3  |
| 77 | Doxorubicin (Adriamycin) hydrochloride | 579.98  | 172 | 0.338  | 6  | 5  |
| 78 | E-Cardamoni                            | 60.06   | 200 | -1.043 | 1  | 2  |
| 79 | Echinacoside                           | 786.73  | 127 | -1.263 | 8  | 12 |
| 80 | Emodin                                 | 270.24  | 200 | 2.568  | 2  | 3  |
| 81 | Enoxolone                              | 470.68  | 200 | 5.656  | 2  | 1  |
| 82 | Epiandrosterone                        | 290.44  | 100 | 3.588  | 1  | 1  |
| 83 | Epinephrine bitartrate                 | 333.29  | 201 | -3.996 | 2  | 6  |
| 84 | Esculin                                | 340.28  | 200 | -0.514 | 4  | 5  |
| 85 | Estradiol                              | 272.38  | 198 | 3.838  | 0  | 2  |
| 86 | Estriol                                | 288.39  | 198 | 2.871  | 0  | 3  |
| 87 | Ferulic acid                           | 194.19  | 201 | 1.669  | 2  | 1  |
| 88 | Fisetin                                | 286.24  | 199 | 1.872  | 2  | 4  |
| 89 | Flavanone                              | 224.25  | 196 | 3.099  | 2  | 0  |
| 90 | Formononetin                           | 268.26  | 201 | 2.608  | 3  | 1  |
| 91 | Forskolin                              | 410.5   | 200 | 0.837  | 4  | 2  |
| 92 | Gambogic acid                          | 628.75  | 159 | 6.957  | 6  | 1  |
| 93 | Genipin                                | 226.23  | 199 | -0.319 | 3  | 1  |
| 94 | Geniposide                             | 388.37  | 201 | -2.066 | 5  | 5  |
| 95 | Geniposidic acid                       | 374.34  | 43  | -2.291 | 4  | 5  |
| 96 | Genistein                              | 270.24  | 200 | 2.14   | 2  | 3  |
| 97 | Genistin                               | 432.37  | 199 | 0.21   | 4  | 6  |

|     |                           |         |     |        |    |    |
|-----|---------------------------|---------|-----|--------|----|----|
| 98  | Gentiopicroside           | 356.32  | 199 | -1.523 | 5  | 4  |
| 99  | Ginkgolide B              | 424.4   | 200 | -0.854 | 7  | 2  |
| 100 | Ginkgolide C              | 440.4   | 200 | -1.753 | 7  | 3  |
| 101 | Glabridin                 | 324.37  | 197 | 3.999  | 2  | 2  |
| 102 | Glucosamine hydrochloride | 215.63  | 19  | -2.422 | 1  | 4  |
| 103 | gossypol-acetic acid      | 578.61  | 173 | 6.388  | 3  | 6  |
| 104 | Gramine                   | 174.24  | 201 | 2.197  | 0  | 1  |
| 105 | Guanosine                 | 283.24  | 198 | -2.38  | 4  | 5  |
| 106 | Gynostemma extract        | 917.13  | 206 | 1.059  | 6  | 11 |
| 107 | Hematoxylin               | 302.28  | 202 | 1.691  | 1  | 4  |
| 108 | Hesperetin                | 302.27  | 198 | 2.357  | 3  | 3  |
| 109 | Hesperidin                | 610.56  | 164 | -0.431 | 7  | 8  |
| 110 | Honokiol                  | 266.334 | 199 | 4.88   | 0  | 2  |
| 111 | Hordenine                 | 165.23  | 200 | 1.982  | 0  | 1  |
| 112 | Hydrocortisone            | 362.46  | 201 | 1.283  | 2  | 2  |
| 113 | Hyodeoxycholic acid       | 392.57  | 199 | 4.014  | 1  | 2  |
| 114 | Icariin                   | 676.66  | 74  | 0.983  | 7  | 8  |
| 115 | Inosine                   | 268.23  | 198 | -2.249 | 4  | 4  |
| 116 | Isoliquiritigenin         | 256.25  | 47  | 2.975  | 1  | 3  |
| 117 | JNJ-1661010               | 365.45  | 99  | 3.271  | 3  | 1  |
| 118 | Kaempferol                | 286.23  | 199 | 1.872  | 2  | 4  |
| 119 | Kitasamycin               | 785.96  | 127 | 2.578  | 10 | 3  |
| 120 | Lactulose                 | 342.3   | 199 | -4.621 | 3  | 8  |
| 121 | L-adrenaline              | 183.2   | 22  | 0.372  | 0  | 4  |
| 122 | L-thyroxine               | 776.87  | 129 | 2.026  | 2  | 2  |
| 123 | Luteolin                  | 286.24  | 199 | 2.168  | 2  | 4  |
| 124 | Melatonin                 | 232.28  | 202 | 1.555  | 2  | 2  |
| 125 | Methyl gallate            | 100.12  | 360 | 0.959  | 2  | 3  |
| 126 | Methyl vanillate          | 182.17  | 198 | 1.426  | 3  | 1  |
| 127 | Methylmalonate            | 118.09  | 195 | 0.068  | 2  | 0  |
| 128 | Morin hydrate             | 320.25  | 200 | 1.423  | 2  | 5  |
| 129 | Mycophenolic acid         | 320.34  | 200 | 3.157  | 4  | 1  |
| 130 | Myricetin                 | 318.24  | 198 | 1.388  | 2  | 6  |
| 131 | Myricitrin                | 464.38  | 200 | 0.347  | 4  | 8  |
| 132 | Naringenin                | 272.25  | 198 | 2.373  | 2  | 3  |
| 133 | Natamycin                 | 665.73  | 11  | -2.824 | 7  | 5  |
| 134 | Neomangiferin             | 584.48  | 171 | -2.325 | 5  | 11 |
| 135 | Nicotinic acid            | 123.11  | 203 | 0.309  | 2  | 0  |
| 136 | Nobiletin                 | 402.39  | 201 | 3.038  | 8  | 0  |
| 137 | Nocodazole                | 301.32  | 23  | 3.008  | 4  | 2  |
| 138 | Norcantharidin            | 168.15  | 196 | -0.117 | 4  | 0  |
| 139 | Novobiocin sodium         | 634.61  | 158 | 2.747  | 8  | 4  |
| 140 | Oleanolic acid            | 456.7   | 46  | 6.282  | 1  | 1  |
| 141 | Oxytetracycline           | 460.43  | 200 | -1.904 | 3  | 5  |
| 142 | Paclitaxel                | 853.91  | 200 | 3.055  | 11 | 3  |
| 143 | Paeoniflorin              | 480.46  | 200 | -1.283 | 6  | 4  |
| 144 | Palmatine                 | 352.4   | 199 | 4.161  | 4  | 0  |
| 145 | Palmatine chloride        | 387.86  | 199 | 1.488  | 4  | 0  |
| 146 | Palmitic acid             | 256.42  | 199 | 6.393  | 1  | 0  |
| 147 | Patchouli alcohol         | 222.37  | 198 | 3.427  | 0  | 0  |

|     |                                  |        |     |        |    |    |
|-----|----------------------------------|--------|-----|--------|----|----|
| 148 | Phloretic acid                   | 166.17 | 199 | 1.708  | 1  | 1  |
| 149 | Piceatannol                      | 244.24 | 197 | 2.848  | 0  | 4  |
| 150 | Picroside I                      | 492.47 | 199 | -1.07  | 6  | 5  |
| 151 | Picroside II                     | 512.46 | 195 | -1.796 | 7  | 6  |
| 152 | Piperine                         | 285.34 | 200 | 2.864  | 3  | 0  |
| 153 | Polydatin                        | 390.38 | 200 | 1.16   | 2  | 6  |
| 154 | Progesterone                     | 314.46 | 70  | 3.86   | 2  | 0  |
| 155 | Quercetin                        | 302.24 | 202 | 1.63   | 2  | 5  |
| 156 | Quercetin dihydrate              | 338.27 | 198 | 1.216  | 2  | 5  |
| 157 | Quinidine sulfate                | 648.83 | 154 | 4.446  | 4  | 2  |
| 158 | Rapamycin                        | 914.18 | 22  | 6.295  | 10 | 2  |
| 159 | Rebaudioside A                   | 967.01 | 41  | -3.476 | 9  | 14 |
| 160 | Reserpine                        | 608.68 | 21  | 4.242  | 9  | 1  |
| 161 | Resveratrol                      | 228.24 | 197 | 3.09   | 0  | 3  |
| 162 | Rosmarinic acid                  | 360.31 | 200 | 2.706  | 3  | 4  |
| 163 | Rotundine                        | 355.43 | 23  | 3.599  | 4  | 0  |
| 164 | Rutin                            | 610.52 | 164 | -1.158 | 6  | 10 |
| 165 | Salidroside                      | 300.3  | 200 | -0.443 | 2  | 5  |
| 166 | Schisandrin B                    | 400.46 | 200 | 5.067  | 6  | 0  |
| 167 | Scopolamine hydrobromide         | 384.26 | 198 | 1.314  | 3  | 1  |
| 168 | Secoisolariciresinol diglucoside | 686.7  | 146 | -0.651 | 6  | 10 |
| 169 | Silymarin                        | 482.44 | 199 | 2.592  | 5  | 5  |
| 170 | Sodium danshensu                 | 220.15 | 32  | -0.795 | 0  | 3  |
| 171 | Sophocarpine                     | 246.35 | 199 | 1.394  | 1  | 0  |
| 172 | Sophoricoside                    | 432.38 | 199 | 0.21   | 4  | 6  |
| 173 | Sorbitol                         | 182.17 | 198 | -2.941 | 0  | 6  |
| 174 | Spectinomycin dihydrochloride    | 405.27 | 200 | -1.566 | 4  | 4  |
| 175 | Spermidine trihydrochloride      | 254.63 | 118 | -0.024 | 0  | 3  |
| 176 | Stachydrine                      | 143.18 | 196 | -2.431 | 0  | 0  |
| 177 | Streptozotocin                   | 265.22 | 200 | -2.285 | 3  | 4  |
| 178 | Succinic acid                    | 118.09 | 195 | -0.36  | 2  | 0  |
| 179 | Synephrine hydrochloride         | 203.67 | 69  | 0.997  | 0  | 3  |
| 180 | Syringic acid                    | 198.17 | 197 | 1.184  | 3  | 1  |
| 181 | Tanshinone IIA sulfonate         | 396.39 | 199 | 1.873  | 3  | 0  |
| 182 | Tauroursodeoxycholic acid        | 499.7  | 198 | 2.997  | 1  | 3  |
| 183 | Tetracycline hydrochloride       | 480.9  | 200 | -0.513 | 3  | 4  |
| 184 | Tiglic acid                      | 100.12 | 200 | 1.341  | 1  | 0  |
| 185 | Tretinoin                        | 300.4  | 200 | 5.551  | 1  | 0  |
| 186 | Tryptamine                       | 160.22 | 200 | 1.55   | 0  | 2  |
| 187 | Tyrosol                          | 138.16 | 195 | 1.304  | 0  | 2  |
| 188 | Umbelliferone                    | 162.14 | 197 | 1.657  | 2  | 1  |
| 189 | Ursodiol                         | 392.57 | 201 | 4.014  | 1  | 2  |
| 190 | Ursolic acid                     | 456.7  | 199 | 6.327  | 1  | 1  |
| 191 | Vanillin                         | 152.15 | 197 | 1.33   | 2  | 1  |
| 192 | Vanillylacetone                  | 194.23 | 196 | 1.792  | 2  | 1  |
| 193 | Vincristine sulfate              | 923.04 | 108 | 3.365  | 8  | 1  |
| 194 | Vitamin C                        | 176.12 | 199 | -1.709 | 2  | 4  |
| 195 | Xanthone                         | 196.2  | 199 | 2.964  | 2  | 0  |
| 196 | Yohimbine hydrochloride          | 390.9  | 31  | 3.204  | 2  | 2  |
